# Supplementary material for: Effects of Different Training Interventions on Heart Rate Variability and Cardiovascular Health and Risk Factors in Young and Middle-Aged Adults: A Systematic Review
Source: Front Physiol. 2021 Apr 23;12:657274. doi: 10.3389/fphys.2021.657274 (PMC8107721; doi:10.3389/fphys.2021.657274)
Supplement: Supplementary file 3 [file Table_3.XLSX]

## Sheet: Methods
Author, year	Sample size	Age	Gender	Physical state	ECG method (ECG or belt)	Resting heart rate	HRV measures			Respiration (paced or spontaneous)	Recording length (length for analysis)	Frequency	Position	Daytime of measurement	Intervention							Control group	Setting	Secondary outcomes
							Time domain	Frequency domain	Non-linear						Type	Duration	Sessions/week	Session duration	Intensity	Exercises, sets, recovery & repetitions of resistance training	Recovery between sessions
Badrov et al., 2013	32 (IHG3: 12; IHG5: 11; CG: 9)	IHG3: 23±4; IHG5: 27±6; CG: 24±8	100% female	healthy	1-lead ECG	yes	SDNN, RMSSD, pNN50	LF (ln, ms²), HF (ln, ms²), LF nu, HF nu, TP (ln, ms²), LF/HF	SampEn, α1	spontaneous	10 min (256 beats for analysis)	1.000 Hz	supine	n.r.	Isometric handgrip training	8 weeks (post-tests after 4 & 8 weeks)	IHG3: 3; IHG5:5	n.r.	30% of MVC	4x2min unilateral contractions; 4 min recovery	0-2 days	yes	2 sessions/week supervised	BP
Bond et al., 2009	32 (TG: 16; CG: 16)	TG: 20.4±1.9; CG: 22.4±2.2	100% male	healthy	2-lead ECG	yes		HF nu		6 breaths/min	5 min	500 Hz	n.r.	n.r.	Endurance (bicycle)	8 weeks	3	30 min	70% of VO₂ peak		n. r.	yes	supervised	SBP, VO₂ peak
Boutcher et al., 2013	32 (TG: 16; CG: 16)	TG: 23.0±4.0; CG: 21.1±2.4	100% female	healthy, but overweight (BMI: exercisers: 27.7±3.2; controls: 26.0±42.4)	Polar S810i chest belt	yes		LF (ln, ms²), HF (ln, ms²), LF nu, HF nu		spontaneous	15 min	n.r.	supine	completed before 9.00 am	HIIE (cycle ergometer)	12 weeks	3	20 min	80-85% of peak HR	8 s sprint; 12 s recovery	n. r.	yes	supervised	BF, BM, VO₂ max
Brown et al., 2014	73 (NW: 27; BW: 27, CG: 19) (Baseline with N=94)	Baseline: NW: 46.3±9.4; BW: 39.3±10.3; CG: 40.2±11.0	Baseline: NW: 81% male; BW: 73% male, CG: 83% male	healthy, slightly overweight (BMI: 26.3)	eMotion sensor ECG	yes		ln HF		n.r.	3 min	n.r.	sitting	n.r.	Walking	8 weeks	2	2 km (~20 min)	n. r.		n. r.	yes	workplace	BM, BMI, BP, HRR
Buchheit et al., 2010	14	36±7	100% male	healthy, moderately-trained runners with 10 km running performance of 50:23 min pre-training	Polar S810 chest belt	yes	ln RMSSD			spontaneous	5 min	n.r.	supine	immediately after awakening	Endurance (continuous runs and intervals)	8 weeks	3-4	upt to 60 min	70-120% of MAS		n. r.	no	2 sessions supervised, 1-2 sessions self-regulated	BF, BM, HRR
Cheema et al., 2013	37 (TG: 18; CG: 19)	TG: 37±12; CG: 39±13	7 men, 30 women	healthy	ECG (Sphygmocor)	yes	ln SDNN, ln RMSSD, pNN50	ln HF, ln LF, ln LF/HF, ln TP		spontaneous	10 min	n.r.	supine	n.r.	Yoga	10 weeks	3	50 min	n.r.		n. r.	yes	during lunch hour at workplace
Chu et al., 2015	52 (TG: 26, CG: 26)	TG: 27.58±5.72; CG: 24.85±5.17	100% female	healthy (2 with asthma, 1 with mild scoliosis)	ECG	no		LF nu, HF nu, LF/HF		n.r.	10 min	1.024 Hz	supine	n.r.	Yoga	8 weeks	2	60 min	n.r.		n. r.	yes	supervised
Cooke & Carter, 2005	22 (TG: 12; CG: 10)	TG: 21±0.3; CG: 22±0.7	TG: 1 women; CG: 3 women	healthy	3-lead ECG	no	mRR, SDNN	LF, HF, LF nu, HF nu		15 breaths/min	5 min	500 Hz	supine	n.r.	Resistance (whole body)	8 weeks	3	n.r.	75-80% RM	7 exercises; 3x10; 2 min recovery	n. r.	yes (recreationally active)	supervised	BR, SBP
da Silva et al., 2019	30 (HRVG: 15; CG: 15)	HRVG: 25.8±3.1; CG: 27.7±3.6	100% female	healthy, untrained	Polar RS800CX	no	RMSSD			spontaneous	3 min	n.r.	standing	n.r.	Endurance (running)	8 weeks	3	30-40 min	MICT: 75% of Vpeak; HIIT: 100% of Vpeak		1-2 days	yes (predfined training program)	supervised	HRR
Duarte et al., 2015	40 (TG: 22; CG: 18)	TG: TL: 19.2±1.0; TH:19.5 ±1.2. CG: CL: 19.1±0.3; CH:18.9 ±0.6	100% male	healthy	3-lead ECG	yes	RMSSD	HF nu, LF nu, LF/HF		spontaneous	5 min	1.000 Hz	supine	8:30-11:30 am	Endurance (running)	12 weeks	3	40 min	75-85% HR reserve		n. r.	yes	n. r.	HRR
Gamelin et al., 2007	10	21.7±2.2	100% male	healthy, untrained	Polar S810	no	mRR, SDNN, RMSSD, NN50, pNN50	ln (LF+HF), ln LF, ln HF, LF nu, HF nu, LF/HF	SD1, SD2	12 breaths/min	5 min (last 256 s for analysis)	1.000 Hz	supine	6:00-9:00 am	Endurance (intervals and continuous runs on a treadmill)	12 weeks	2-4	7-50 min	70-110% PTV		n. r.	no	supervised	VO₂ max
Heffernan et al., 2007	14	25.0±1.1	100% male	healthy, sedentary	1-lead ECG	no	mRR, SDNN	ln TP, ln LF, LF nu, ln HF, HF nu, LF/HF	SampEn, LZEn	12 breaths/min	> 200 RR intervals	1.000 Hz	supine	n.r.	Resistance (whole body)	6 weeks	3	60 min	n.r.	5 exercises; weeks 1-2: 3x12-15; weeks 3-6: 3x8-12; 1-2 min recovery	n. r.	no	supervised	BF, BM, HRR, VO₂ peak
Heffernan et al., 2009	39	African Americans: 22±1; Whites: 24±1	100% male	healthy	1-lead ECG	no	mRR, RMSSD, pNN50	ln TP, ln LF, LF nu, ln HF, HF nu, ln LF/HF	SampEn	12 breaths/min	15 min (220-260 s for analysis)	1.000 Hz	supine	n.r.	Resistance (whole body)	6 weeks	3	60 min	n.r.	5 exercises; weeks 1-2: 3x12-15; weeks 3-6: 3x8-12; 1-2 min recovery	n. r.	no	supervised	BF, BM, BR, HRR, VO₂ peak
Heydari et al., 2013	38 (TG: 20; CG: 18)	24.9±4.3	100% male	healthy, sedentary, few with overweight (BMI: 23-35 kg/m²)	Polar RS800CX	yes	RMSSD, pNN50	ln + ms²: TP HF, LF, VLF		spontaneous	30 min	1.000 Hz	supine	7:00-11:00 am	HIIE (8 s sprints on cycle ergometer)	12 weeks	3	20 min	80-90% of HR max; 120-130 rpm	12 s recovery between sprints (30-40 rpm)	n. r.	yes	supervised	BM, BMI, BP, BR, VO₂ max
Kim et al., 2017	34 (MAT: 12: HAT: 12; CG: 10)	MAT: 24.08±0.62; HAT: 23.25±0.63; CG: 23.30±0.47	100% male	healthy, habitual smokers	Polar RS800CX	yes	RMSSD, pNN50	HF, HF nu, LF nu, LF/HF	SD1, SD1/SD2	15 breaths/min	10 min	256 Hz	sitting	09:00-11:00 am	Endurance (walking/running on a treadmill)	8 weeks	3	weeks 1-4: 30 min; weeks 5-8: 50 min	MAT: 60% of HRR; HAT: 75% of HRR		n. r.	yes	supervised	BMI, BP, VO₂ max
Kiviniemi et al., 2010	53 (ST: 14; HRV-I: 14: HRV-II: 10; CG: 15)	Men: ST: 37±3; HRV-I: 35±4; CG: 34±4. Women: ST: 34±4; HRV-I: 33±4; HRV-II: 35±4; CG: 34±4	21 men, 32 women	healthy, moderately active	12-lead ECG	yes			SD1	spontaneous	5 min	n.r.	2 min sitting & 3 min standing	morning	Endurance (running, walking or cycling)	8 weeks	at least 5	35-40 min	ST: 2 sessions moderate (~70% of HR peak) + 3 sessions vigorous (~85% of HR peak); HRV-groups: moderate or vigorous on basis of daily HRV		n. r.	yes	unsupervised	VO₂ peak
Martinmäki et al., 2008	11	36.8±7.2	100% male	healthy	Polar Electro	yes		TP, HF, LF		spontaneous	3x3 min	1.000 Hz	supine, sitting & standing	same time, n. r.	Endurance (cycling, running, Nordic Walking)	14 weeks	2	45-90 min	Weeks 1-7: 45 min supervised: 15 min below AT, 10 min between AT+AnT, 5 min above AnT, 15min below AT; 60 min unsupervised: below AT. Weeks 8-14: 75 min supervised: warm-up below AT, 2x10 min between AT+Ant, 2x5 min above AnT, cool-down below AT; 60-90min unsupervised: below AT		n. r.	no	1 session supervised, 1 unsupervised	VO₂ peak
McHugh et al., 2012	16	23.94±5.57 (post)	7 males, 9 females	healthy, VO2 max below 50th percentile of normative data	2-lead ECG	no		HF nu, LF/HF		12 breaths/min	5 min	1.000 Hz	supine	7:00-11:00 am	Endurance (recreational jogging)	7 weeks	2	n.r.	Week 1: 1 mile; weeks 2+3: weekly increase of 0.25 miles; weeks 4-7: weekly increase of 0.5 miles		1 & 4 days	no	unsupervised	BF, BM, BMI, HRR, VO₂ max
Moreira et al., 2017	18 (TG: 10; CG: 8)	TG: 25.4±3.3; CG: 29.6±6.3	100% male	healthy	Polar RS800CX	yes	RMSSD, mRR, pNN50		SD1	n. r.	20 min	n. r.	sitting	5:00-6:00 pm	Capoeira	10 weeks	1	90 min	67% of Hrmax	4-7 exercises	6 days	yes	supervised	BP
Nuuttila et al., 2017	24 (HRVG, 13; PD: 11)	HRVG: 29±4: PD: 31±5	100% male	healthy, recreationally trained	Training, morning: Garmin 920XT. Night: Firstbeat Bodyguard Decvice	yes	RMSSD	LF, HF, TP		n. r.	3 min morning, 4 h night	n. r.	supine	morning	HIT (running & resistance (whole body))	8 weeks	6	30-90 min	alternating low- and high-intensity	4 exercises: 2-3x5-10; 2 exercises: 3x5-6; 2 exercises: 3x20	1 rest day/week	no	supervised	BF, BM, VO₂ max
Pal et al., 2014	60 (20-29y, 30-39y, 40-49y; 20 in each group)	AG I: 20-29; AG II: 30-39; AG III: 40-50	100% male	healthy	ECG (ProComp)	yes	mRR, SDNN, RMSSD, pNN50	HF nu, LF nu, LF/HF, TP		n. r.	5 min	n. r.	supine	n. r.	Yoga	3 months	6	60 min	n. r.	n. r.	n. r.	no	supervised	BM, BMI, BP
Rezende Barbosa et al., 2016	29 (FTG: 13; CG: 16)	FTG: 23.0±2.1; CG: 20.6±1.3	100% female	healthy	Polar S810i chest belt	no	mRR, RRtri, TINN		SD1, SD2, SD1/SD2	spontaneous	20 min	n. r.	supine	7:00-12:00 am	Resistance (whole body)	12 weeks	3	60 min	increasing, 30% to 100 % of 1 RM	increasing, 2 to 6 sets with 20 to 1 repetions	24-72 h	yes	supervised
Schumann et al., 2017	24 (ST: 14; TL: 10)	34.0±7.0	100% men	healthy, recreationally endurance-trained	Polar RS800CX	yes	RMSSD	HF, LF, LF/HF		n. r.	180 s supine, 120 s standing	n. r.	supine & standing	n. r.	Endurance (focused on running but cycling and cross-country skiing for low-intensity exercises were permitted too)	12 weeks	4-6	n.r.	60-90% of HR max		2 days	no	n. r., transfer of training data to the online software	BF, BM, VO₂ max
Sousa Fortes et al., 2018	31 (CL: 10; MS: 11; CG: 10)	CL: 22.04±1.7; MS: 21.72±1.7; CG: 21.85±1.9	100% men	healthy	Polar RS800CX	no	ln RMSSD			n. r.	5 min	1.000 Hz	n. r.	n. r.	Resistance (bench press & leg press)	8 weeks	3	n. r.	75% of 1 RM	2 exercises; CL: 3x2x4; MS: 3x8; recovery 100 s or 120 s	48 h	yes	supervised
Varela-Sanz et al., 2017	31 (TT: 11, PT: 10, CG: 10)	TT: 22.36±2.62; PT: 21±2.71; CG: 22.2±2.44	26 men, 5 women	sport science students, healthy	Polar S800	yes	SDNN, RMSSD	LF, HF		n. r.	n. r.	n. r.	supine & standing	08:00:00	2x endurance (brisk walking or running) & resistance (bench press & half squat); 1x endurance	8 weeks	3	2 x 120 min, 1 x 60 min	Endurance: TT: 24-37 min running at 65-75% of MAS; PT: Monday: 35-65 min walking at 35-40% of MAS, Wedensday: plus 2x10-12 sprints 15 s at 120% of MAS. Resistance: 2 exercises; TT: 3-5x10-12; PT: 3-5x5 (Monday), 2-4x15 (Friday). Recovery: resistance: 3 min; sprints: 15 s and 2 min		1-2 days	yes	supervised	BM, BMI, VO₂ max (estimated)
Wu et al., 2011	47 (TG:22; CG:25; Follow-up: 17)	TG: 21.0±1; CG: 21.0±0.9	100% female	healthy, sedentary	1-lead ECG (CheckMyHeart Handheld, right wrist to left wirst)	yes	SDNN, RMSSD	LF, HF, LF nu, HF nu		n. r.	5 min	n. r.	sitting	n.r.	Endurance (running on a treadmill)	6 weeks	3	30 min	6.2±0,5 km/h; BORG: 12 or 13 (50% to 74% of VO2 max) consumption (VO2max		n. r.	yes	n.r.	BMI
